# Supplementary material
Source: PubMed Central journal article supplement (PMC1242293)

**A** Scores Plot: PCA on full GC-TOF data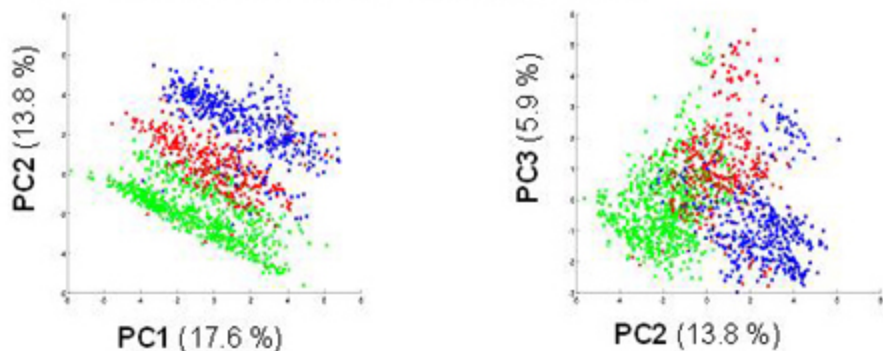**B** Loading plot: PCA on full GC-TOF data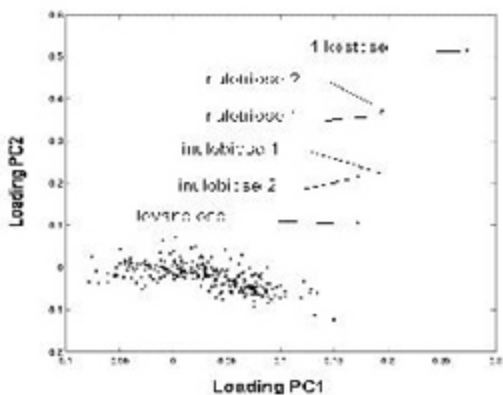**C** PCA on GC-TOF data omitting the 6 out-of-range metabolites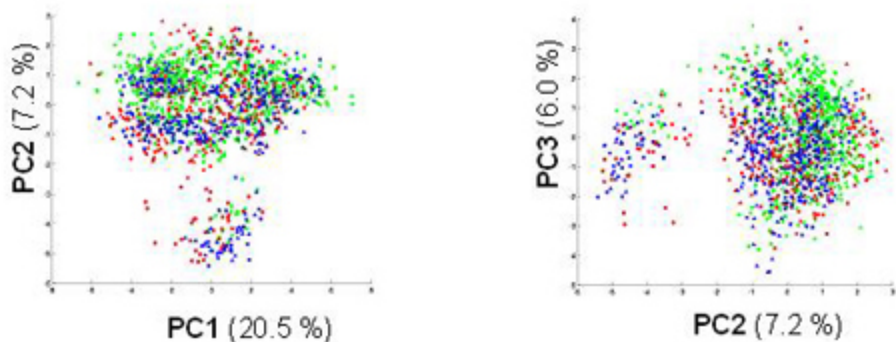

Supplement: pnas_0503955102_2.pdf [file pnas_0503955102_2.pdf]
