# Supplementary material
Source: PubMed Central journal article supplement (PMC1242293)
Supplement: pnas_0503955102_4.pdf [file pnas_0503955102_4.pdf]

**A** Decision Tree confusion matrix: full GC-TOF data

Genotype predictions from Decision Tree models

True sample classes

|      | Ag        | Gr        | Li        | So        | De1       | De2       | S18       | S22       | S36       | SF19      | SF30      | SF34      |
|------|-----------|-----------|-----------|-----------|-----------|-----------|-----------|-----------|-----------|-----------|-----------|-----------|
| Ag   | <b>50</b> | 2         | 1         | 1         | 3         | 0         | 1         | 0         | 0         | 0         | 0         | 0         |
| Gr   | 0         | <b>55</b> | 1         | 1         | 3         | 0         | 0         | 0         | 0         | 0         | 0         | 0         |
| Li   | 3         | 3         | <b>48</b> | 3         | 3         | 0         | 0         | 0         | 0         | 0         | 0         | 0         |
| So   | 2         | 1         | 0         | <b>54</b> | 1         | 0         | 2         | 0         | 0         | 0         | 0         | 0         |
| De1  | 8         | 1         | 1         | 1         | <b>38</b> | 11        | 0         | 0         | 0         | 0         | 0         | 0         |
| De2  | 3         | 9         | 1         | 4         | 9         | <b>34</b> | 0         | 0         | 0         | 0         | 0         | 0         |
| S18  | 2         | 0         | 1         | 3         | 0         | 0         | <b>33</b> | 11        | 10        | 0         | 0         | 0         |
| S22  | 1         | 0         | 1         | 0         | 0         | 0         | 8         | <b>40</b> | 8         | 1         | 1         | 0         |
| S36  | 0         | 0         | 0         | 2         | 1         | 0         | 6         | 5         | <b>44</b> | 1         | 0         | 1         |
| SF19 | 0         | 0         | 0         | 0         | 0         | 0         | 0         | 1         | 0         | <b>51</b> | 1         | 7         |
| SF30 | 0         | 0         | 0         | 0         | 0         | 0         | 0         | 2         | 0         | 4         | <b>47</b> | 7         |
| SF34 | 0         | 0         | 0         | 1         | 0         | 0         | 0         | 0         | 3         | 1         | 3         | <b>52</b> |

**B** Decision Tree confusion matrix: GC-TOF data with out-of-range metabolites omitted

Genotype predictions from Decision Tree models

True sample classes

|      | Ag        | Gr        | Li        | So        | De1       | De2       | S18       | S22       | S36       | SF19      | SF30      | SF34      |
|------|-----------|-----------|-----------|-----------|-----------|-----------|-----------|-----------|-----------|-----------|-----------|-----------|
| Ag   | <b>48</b> | 1         | 4         | 0         | 0         | 0         | 2         | 0         | 2         | 0         | 0         | 3         |
| Gr   | 1         | <b>50</b> | 1         | 0         | 2         | 1         | 1         | 3         | 0         | 0         | 0         | 1         |
| Li   | 2         | 2         | <b>47</b> | 2         | 1         | 2         | 0         | 3         | 0         | 1         | 0         | 0         |
| So   | 4         | 0         | 1         | <b>47</b> | 0         | 0         | 0         | 0         | 4         | 0         | 0         | 0         |
| De1  | 2         | 0         | 2         | 0         | <b>42</b> | 1         | 1         | 2         | 6         | 2         | 0         | 2         |
| De2  | 0         | 3         | 0         | 0         | 9         | <b>36</b> | 0         | 2         | 2         | 1         | 0         | 7         |
| S18  | 1         | 0         | 1         | 0         | 1         | 3         | <b>30</b> | 8         | 0         | 4         | 6         | 6         |
| S22  | 0         | 3         | 1         | 0         | 2         | 4         | 3         | <b>29</b> | 2         | 5         | 8         | 3         |
| S36  | 1         | 2         | 3         | 1         | 1         | 2         | 2         | 4         | <b>27</b> | 4         | 4         | 9         |
| SF19 | 0         | 0         | 0         | 0         | 4         | 1         | 4         | 7         | 2         | <b>34</b> | 2         | 8         |
| SF30 | 2         | 0         | 0         | 4         | 0         | 1         | 8         | 5         | 2         | 6         | <b>27</b> | 8         |
| SF34 | 1         | 0         | 1         | 1         | 0         | 1         | 4         | 2         | 1         | 3         | 1         | <b>45</b> |
