# Supplementary material
Source: PubMed Central journal article supplement (PMC1242293)

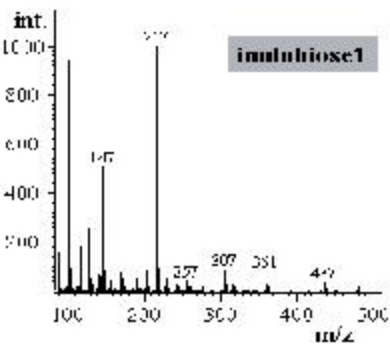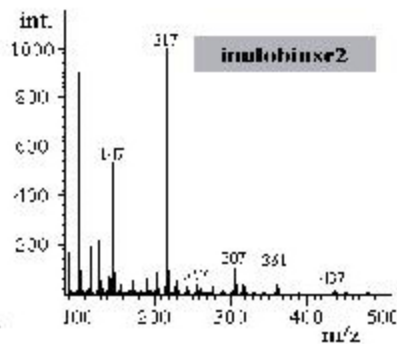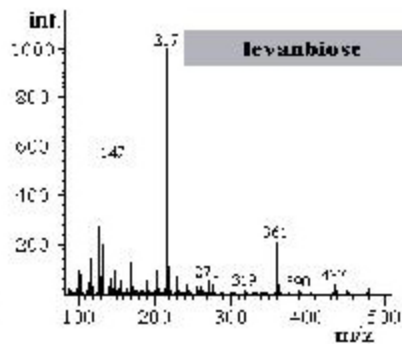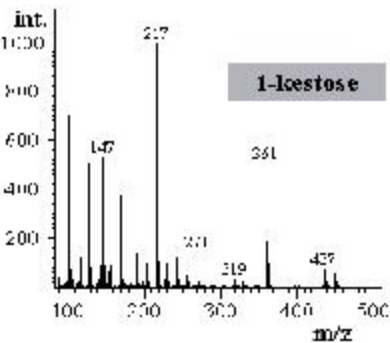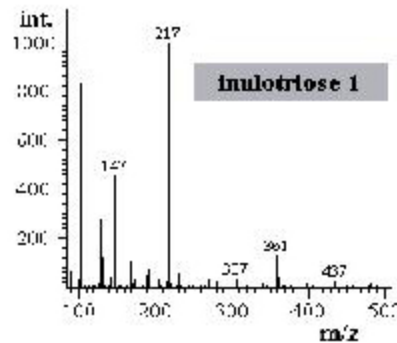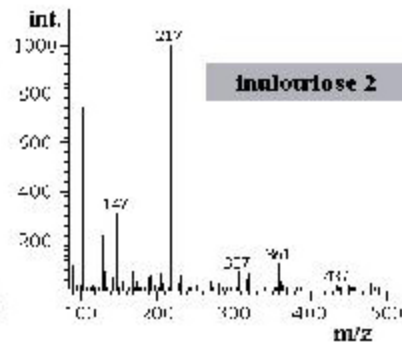

Supplement: pnas_0503955102_1.pdf [file pnas_0503955102_1.pdf]

## A LDA on full GC-TOF data

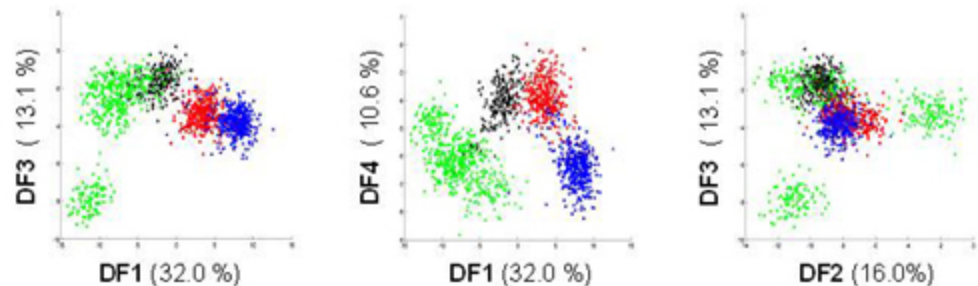

## B LDA on GC-TOF data omitting the 6 out-of-range metabolites

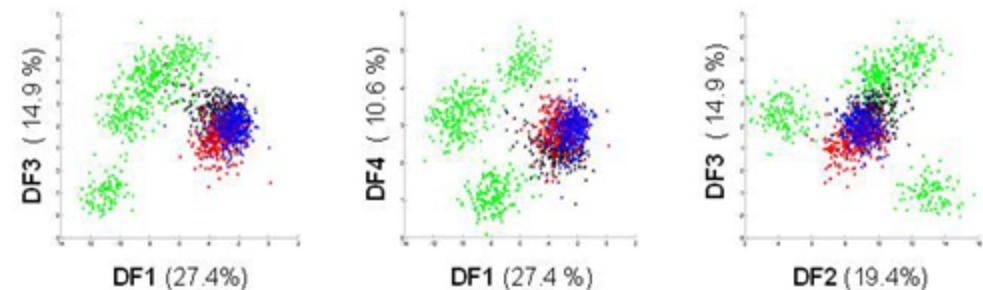

Supplement: pnas_0503955102_3.pdf [file pnas_0503955102_3.pdf]

G.A. content (mg/kg) flesh FW

**A**

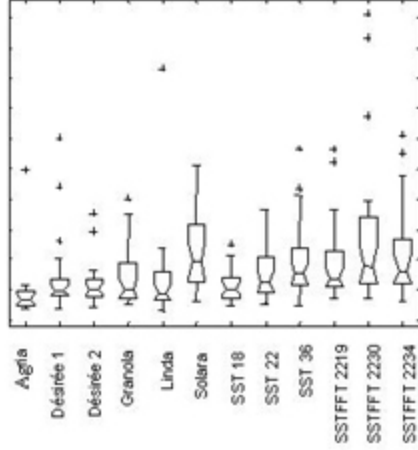

**B**

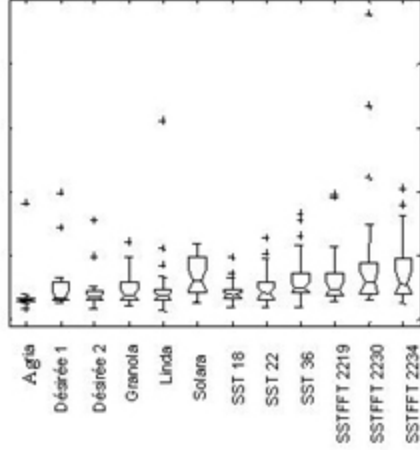

Supplement: pnas_0503955102_5.pdf [file pnas_0503955102_5.pdf]
